# Supplementary material for: Human Papillomavirus (HPV) Infection: Molecular Epidemiology, Genotyping, Seroprevalence and Associated Risk Factors among Arab Women in Qatar
Source: PubMed Central journal article supplement (PMC5207789; doi:10.1371/journal.pone.0169197), 2017-01-03
Supplement: pone.0169197.s001.pdf [file pone.0169197.s001.pdf]

## STUDY QUESTIONNAIRE

**Human Papillomavirus in Arab Countries: Molecular, Clinico-Pathological, Serological, and Vaccine Impact  
Studies in Select Arab Countries  
Protocol # 10165/10**

Country: \_\_\_\_\_

Date form completed: \_\_\_\_\_  
DD MM YYYY

Hospital/Health Center/Clinic: \_\_\_\_\_

**Section I. Socio-demographics**

1. Nationality: \_\_\_\_\_
2. Age: \_\_\_\_\_ years
3. What is your current marital status?  
 Married       Separated/divorced       Widowed
4. Have you been married more than once:     No     Yes      **If no, please go to question 6**
5. How many times have you been married: \_\_\_\_\_ times
6. Please list the date (s) that you were married:  
 \_\_\_\_\_      \_\_\_\_\_      \_\_\_\_\_  
 MM    YYYY      MM    YYYY      MM    YYYY
7. Does/did your husband / did any of your husbands have other wives:       No     Yes
8. How many children do you have?       0     1     2     3     > 3
9. Do you read/write?       No     Yes
10. What is the highest level of school you have completed or the highest degree that you have received?  
 No schooling       Non-college post high school  
 Elementary school       College degree  
 Intermediate school       Undergraduate university degree  
 Secondary/High school       Post-graduate university degree
11. What is your current working status:     Working     Housewife/unemployed  
**If housewife or unemployed, please go to question 13**
12. What is your occupation: \_\_\_\_\_
13. What is your household monthly income?  
 < 5,000 QR     5,000-10,000 QR     15,000-20,000 QR     > 20,000 QR     Don't know
14. How many people including yourself live in your household?      \_\_\_\_\_ people
15. How many rooms (excluding kitchen and bathrooms) does your house have?      \_\_\_\_\_ rooms

**Section II. Women's health**

16. What is your height?      \_\_\_\_\_ cm
17. What is your weight?      \_\_\_\_\_ Kg
18. Do you smoke cigarettes?       No     Yes    **If no, please go to question 20**
19. How many cigarettes do you smoke per day?      \_\_\_\_\_ cigarettes/day
20. Do you smoke *Sheesha*?       No     Yes    **If no, please go to question 22**

21. How many *Sheeshas* do you smoke per week? \_\_\_\_\_ *sheeshas/week*
22. Are you currently using any method of contraception to prevent pregnancy?  No  Yes  
**If no, please go to question 24**
23. What type of contraceptives do you use? (Tick all that applies)
- Birth control pills  Condoms  Intrauterine device  Rhythm method  
 Abstinence (not having sex)  Withdrawal  Female sterilization (tubes tied)  
 Other, specify: \_\_\_\_\_
24. During the last 12 months, have you had a disease which you got through sexual contact?  
 No  Yes  Don't know
25. During the last 12 months, have you had a bad smelling abnormal genital discharge?  
 No  Yes  Don't know
26. During the last 12 months, have you had a genital sore or ulcer?  
 No  Yes  Don't know  
**If the answer is 'no' or 'don't know' to questions 24, 25 and 26, please go to question 28**
27. The last time you had any of the problems listed in questions 23-25, did you seek any kind of medical treatment or advice?  
 No  Yes
28. Have you ever had a Pap test (Pap smear)?  No  Yes **If no, please go to question 36**
29. How often do you have a Pap test?  
 Every six months  One a year  Every other year  Rarely
30. Have you ever had an abnormal Pap test?  No  Yes **If no, please go to question 34**
31. How many abnormal Pap tests have you had? \_\_\_\_\_ tests
32. When was your first abnormal Pap test?  less than a year ago  \_\_\_\_\_ years ago
33. Since your first abnormal Pap test, have you had a Pap test with a worse result?  
 No  Yes  Don't know
34. When was your most recent Pap test? \_\_\_\_\_/\_\_\_\_\_  
MM YYYY
35. What was the result of your most recent Pap test?  
 Normal (negative)  Abnormal  Haven't gotten the results yet
36. Have you heard of HPV?  No  Yes
37. Have you heard of cervical cancer?  No  Yes  
**If the answer is 'no' to questions 35 and 36, please go to question 40**
38. Have you heard of a vaccine for HPV or cervical cancer?  No  Yes  
**If no, please go to question 40**
39. Have you gotten the HPV vaccine?  No  Yes
40. Have any of your female family members been diagnosed with cervical cancer?  No  Yes  
**If no, please go to question 42**
41. What is their relationship to you?  
Person 1: \_\_\_\_\_ Person 2: \_\_\_\_\_ Person 3: \_\_\_\_\_

**THANK YOU FOR YOUR PARTICIPATION**
